# Supplementary material
Source: ML conference proceedings conference paper supplement (https://openaccess.thecvf.com/content/ACCV2020/html/Ohgushi_Road_Obstacle_Detection_ACCV_2020_paper.html)
Supplement: Supplementary file 1 [file comparison with conventional technology.pdf › 0322-supp/comparison with conventional technology.pdf]

# LostAndFound Dataset

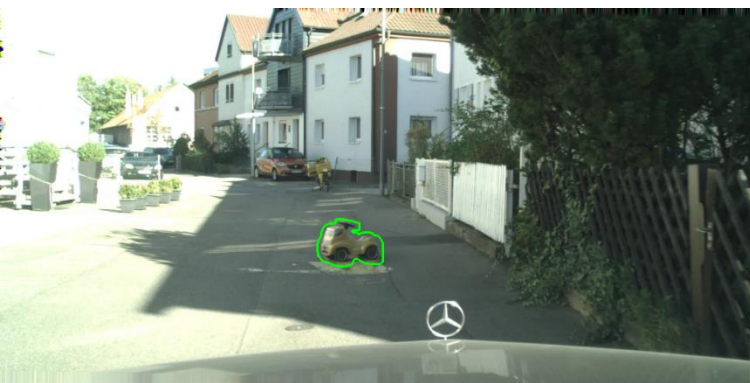

Input image

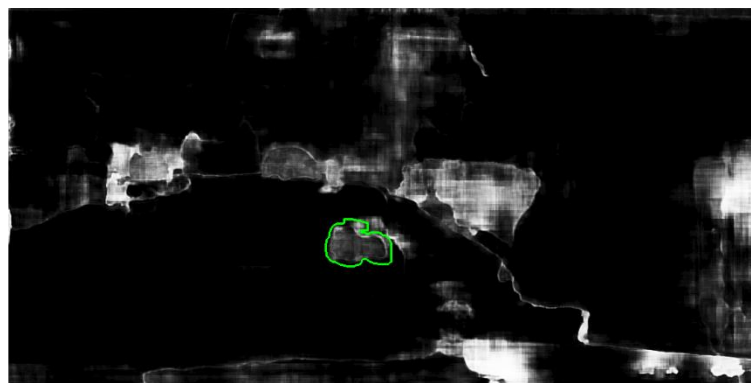

Anomaly heat map (GAN Resynth)

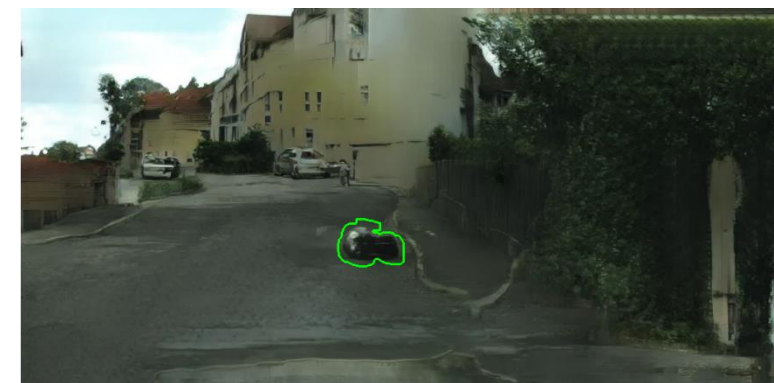

Resynthesized image (GAN Resynth)

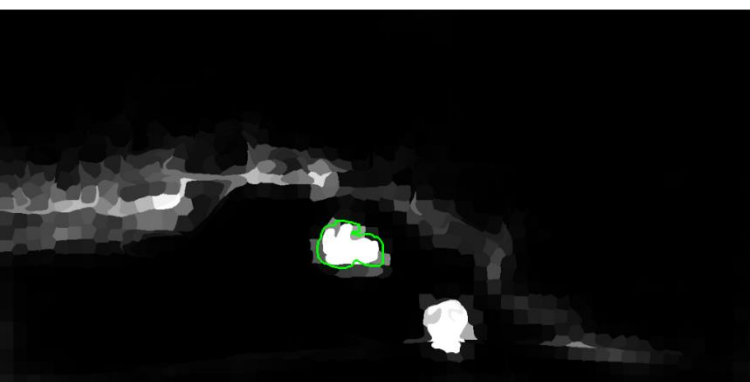

Anomaly heat map (Ours ; w/ postpro)

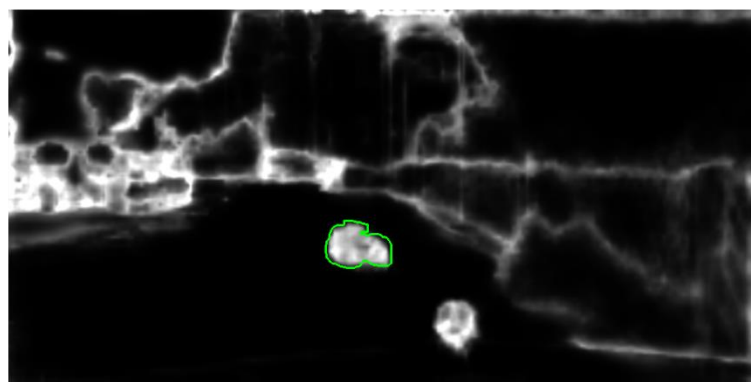

Anomaly heat map (Ours ; w/o postpro)

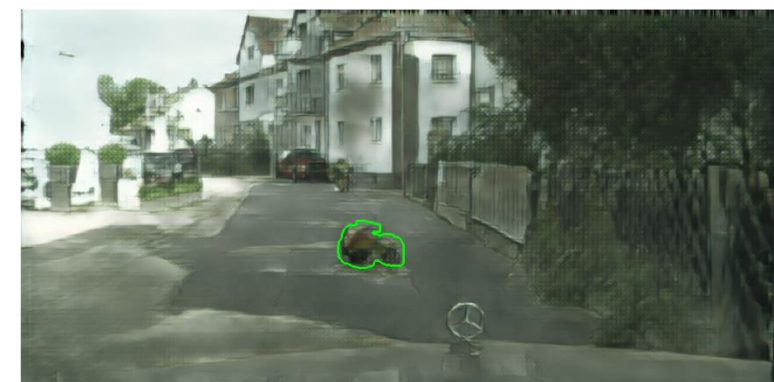

Resynthesized image (Ours)

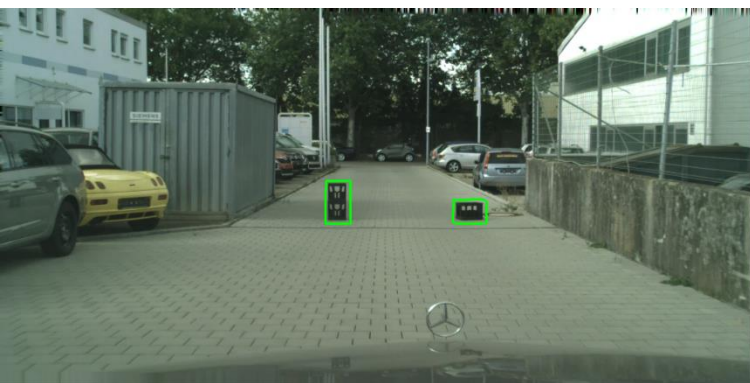

Input image

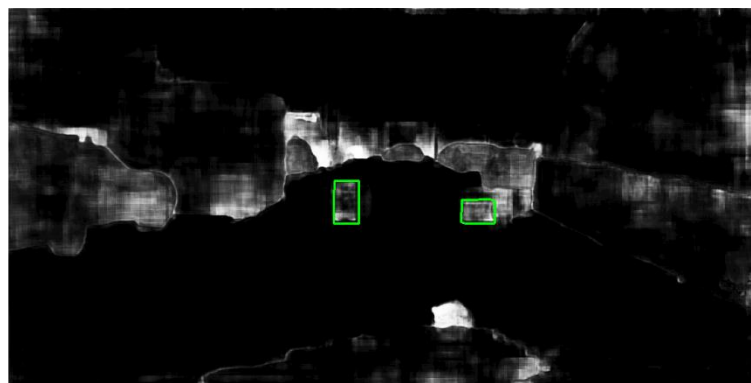

Anomaly heat map (GAN Resynth)

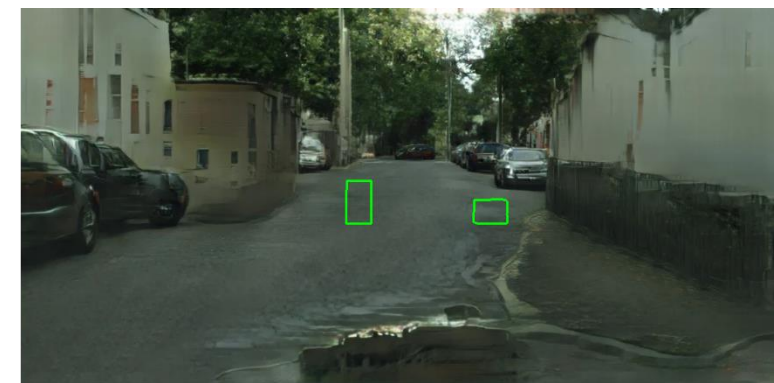

Resynthesized image (GAN Resynth)

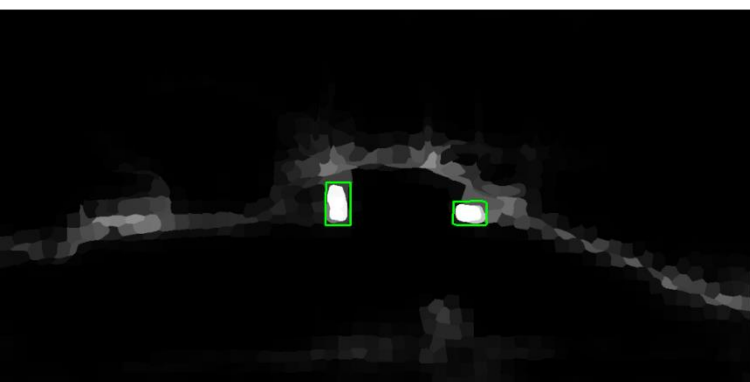

Anomaly heat map (Ours ; w/ postpro)

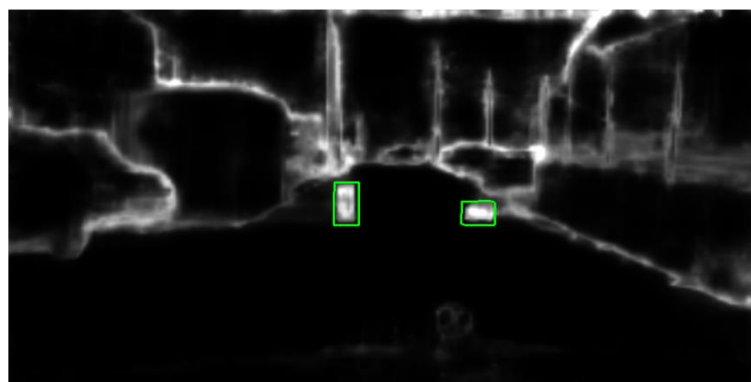

Anomaly heat map (Ours ; w/o postpro)

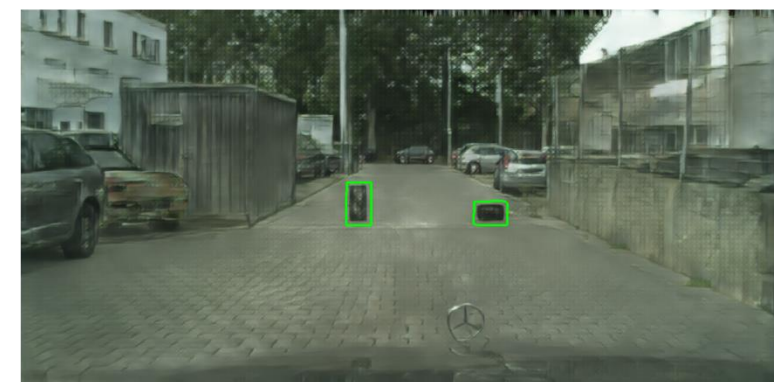

Resynthesized image (Ours)

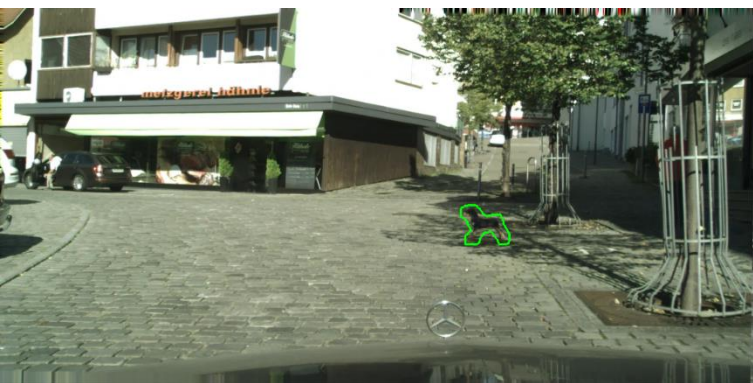

Input image

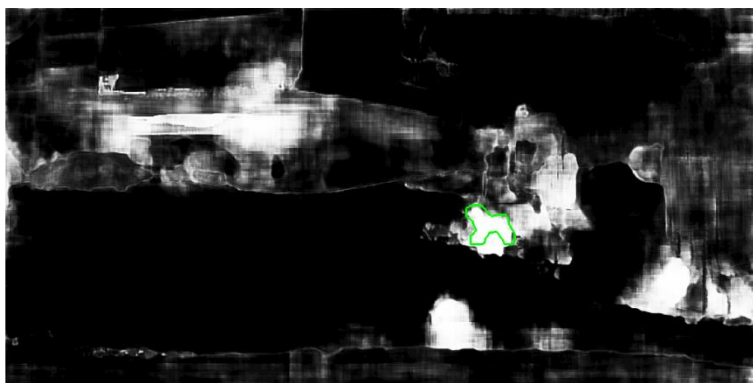

Anomaly heat map (GAN Resynth)

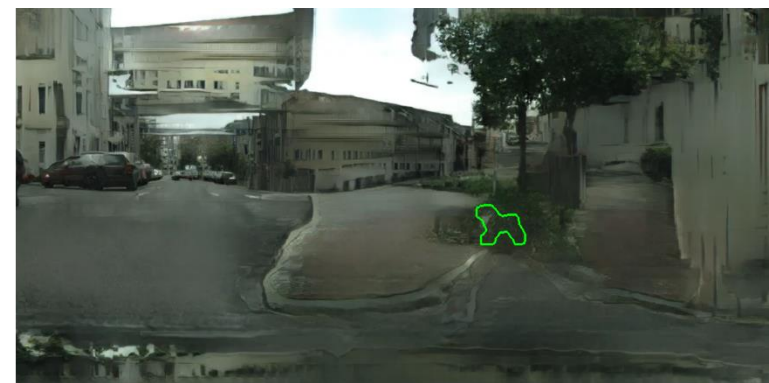

Resynthesized image (GAN Resynth)

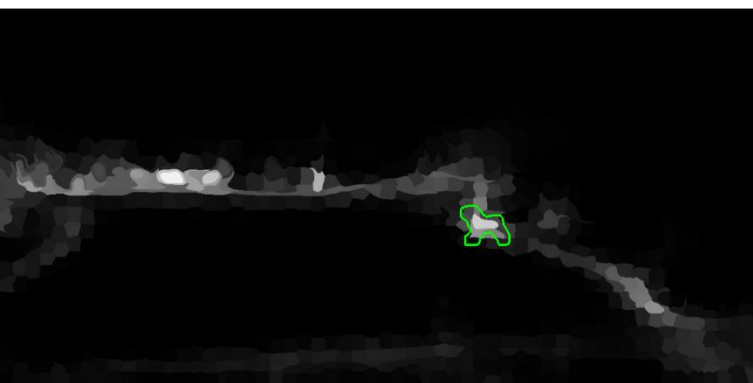

Anomaly heat map (Ours ; w/ postpro)

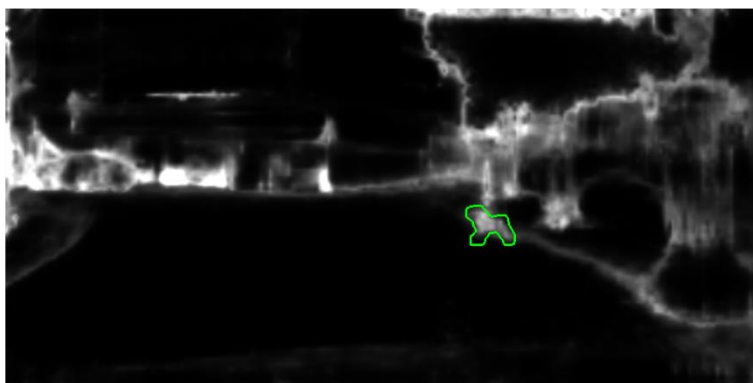

Anomaly heat map (Ours ; w/o postpro)

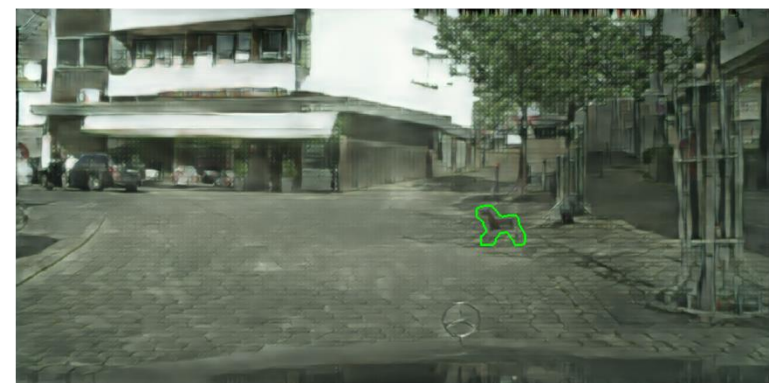

Resynthesized image (Ours)



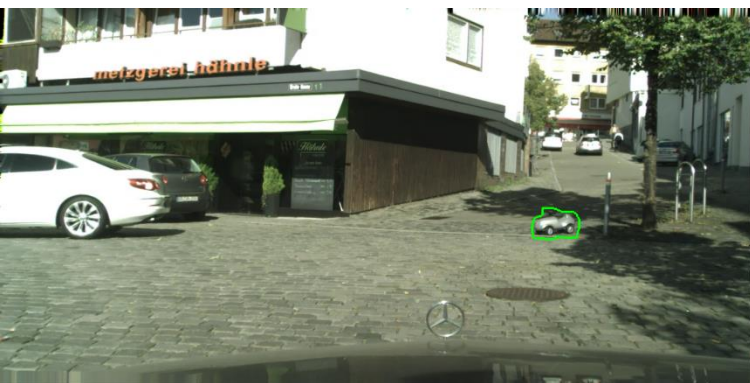

Input image

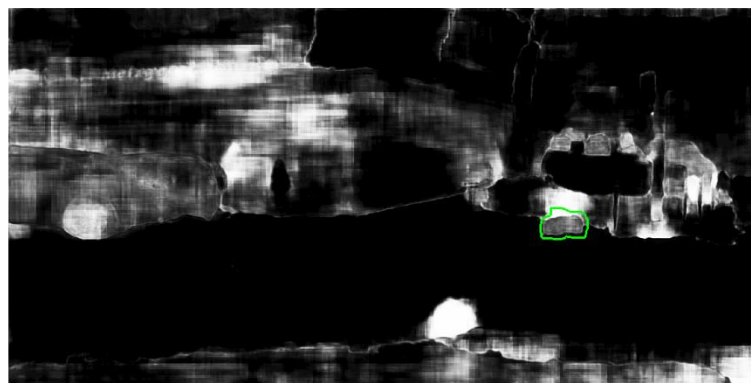

Anomaly heat map (GAN Resynth)

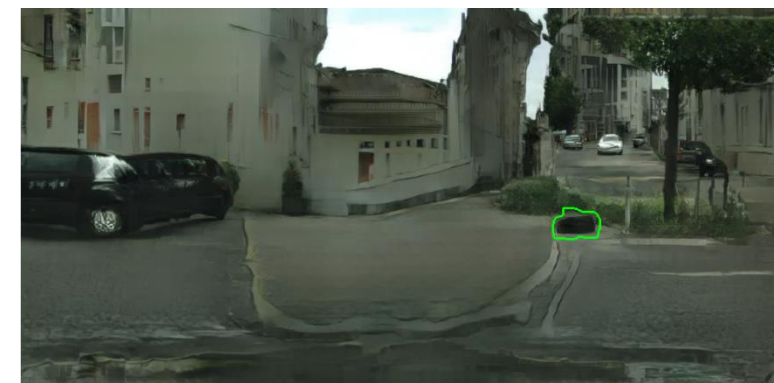

Resynthesized image (GAN Resynth)

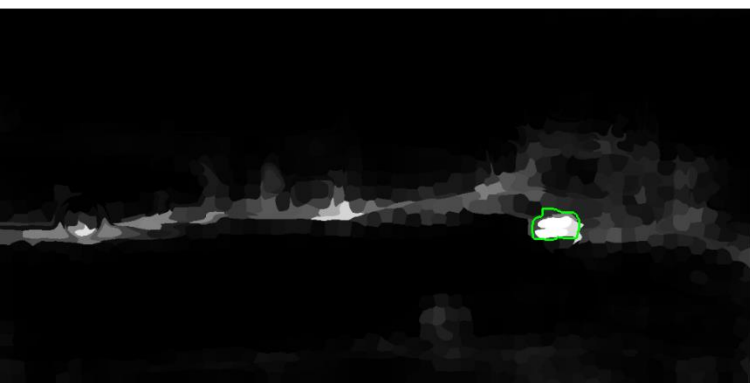

Anomaly heat map (Ours ; w/ postpro)

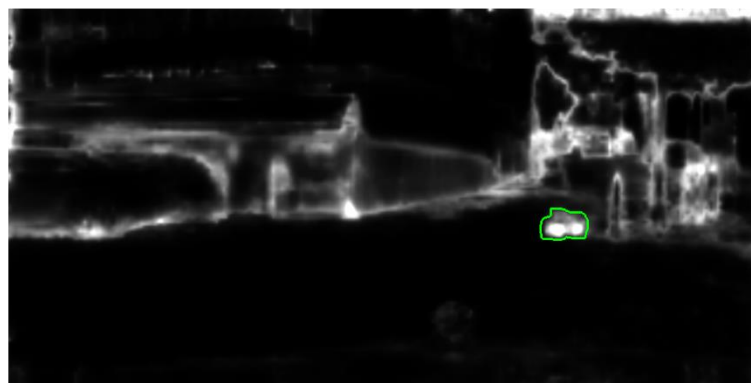

Anomaly heat map (Ours ; w/o postpro)

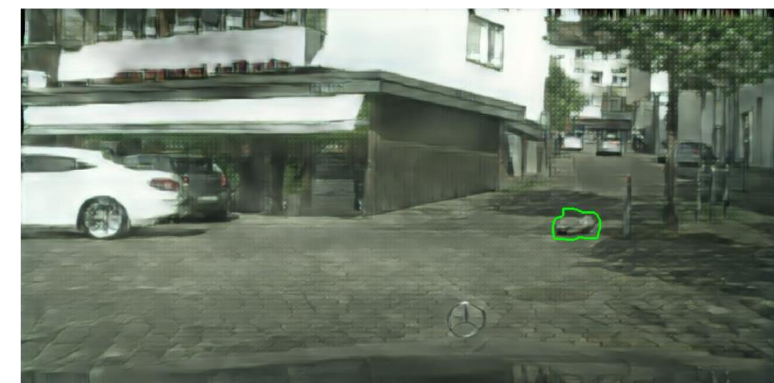

Resynthesized image (Ours)

# Express Highway Dataset

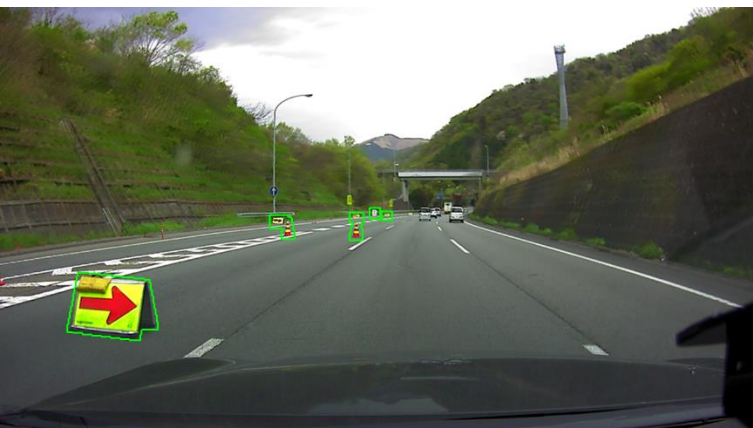

Input image

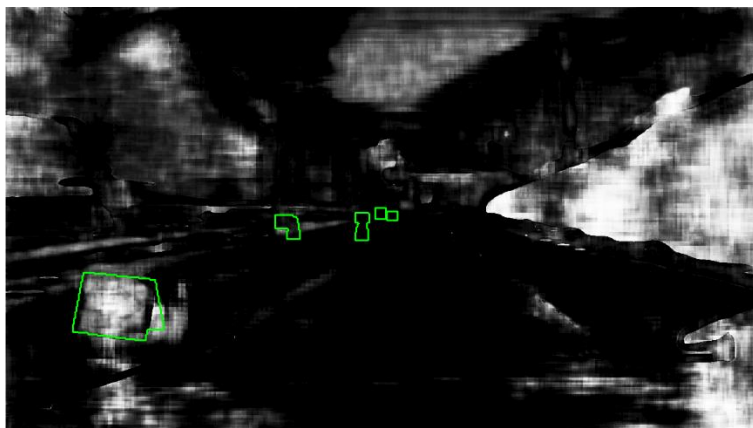

Anomaly heat map (GAN Resynth)

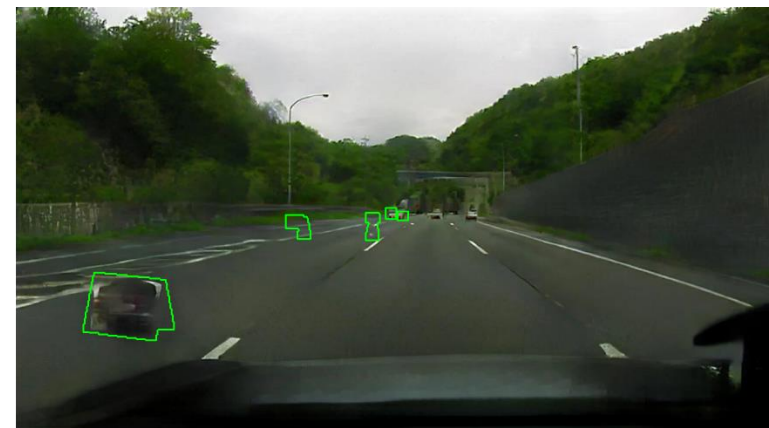

Resynthesized image (GAN Resynth)

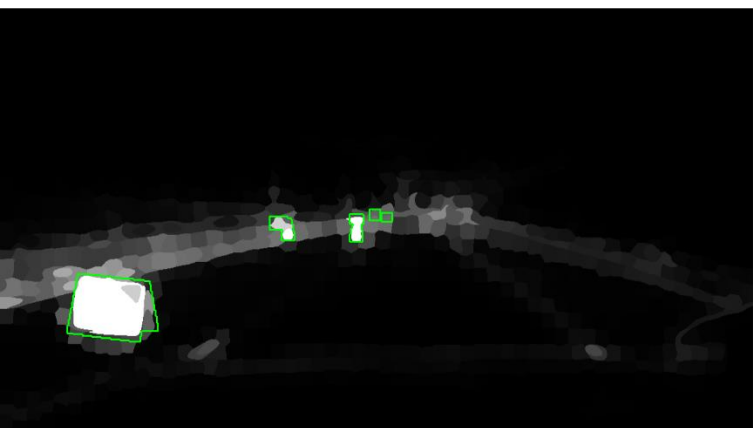

Anomaly heat map (Ours ; w/ postpro)

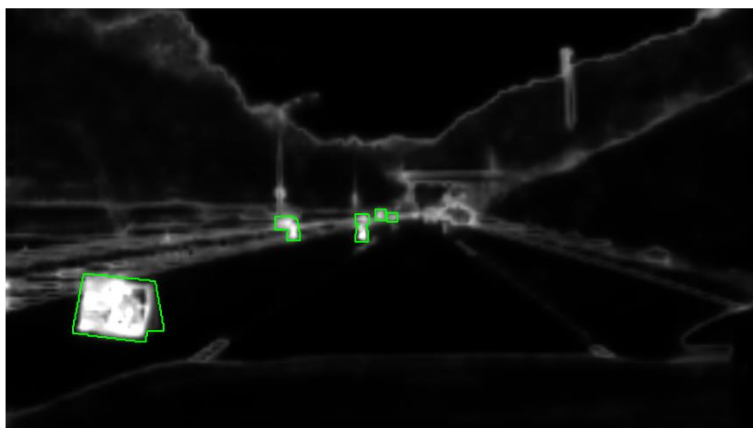

Anomaly heat map (Ours ; w/o postpro)

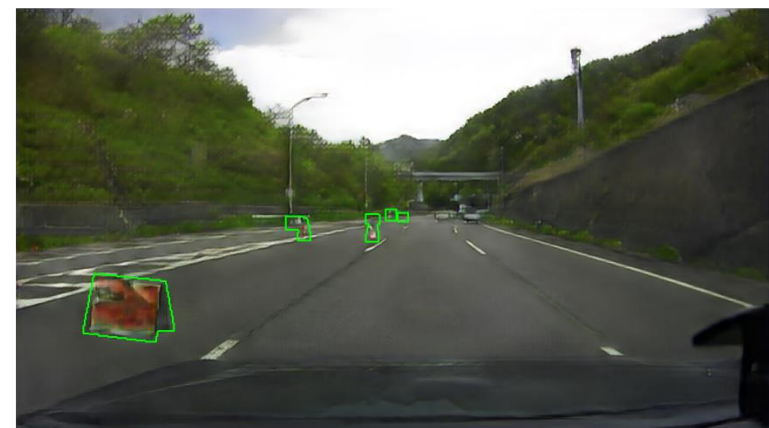

Resynthesized image (Ours)

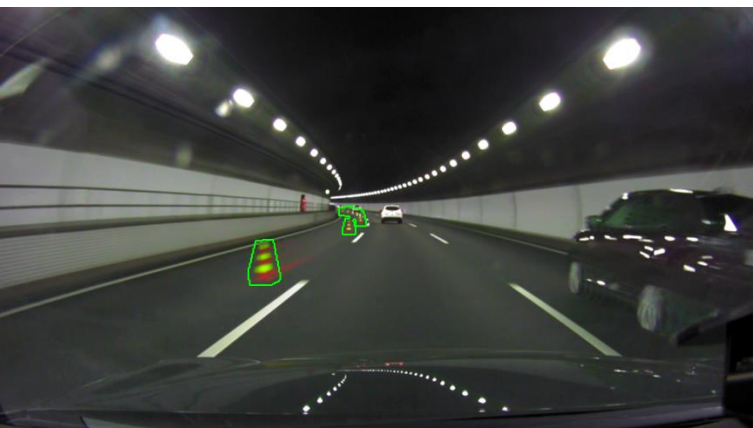

Input image

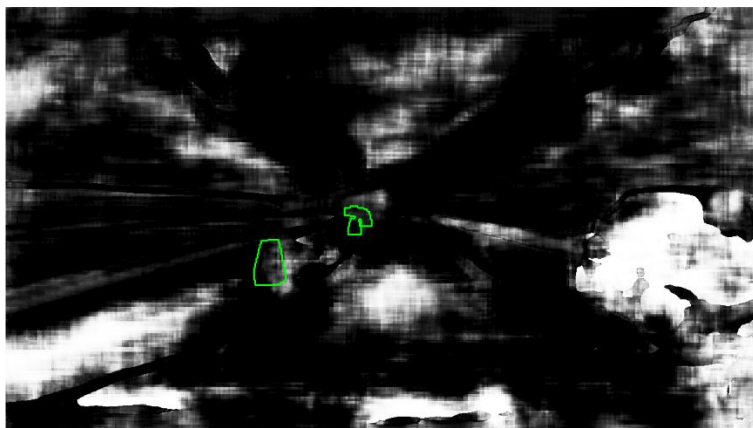

Anomaly heat map (GAN Resynth)

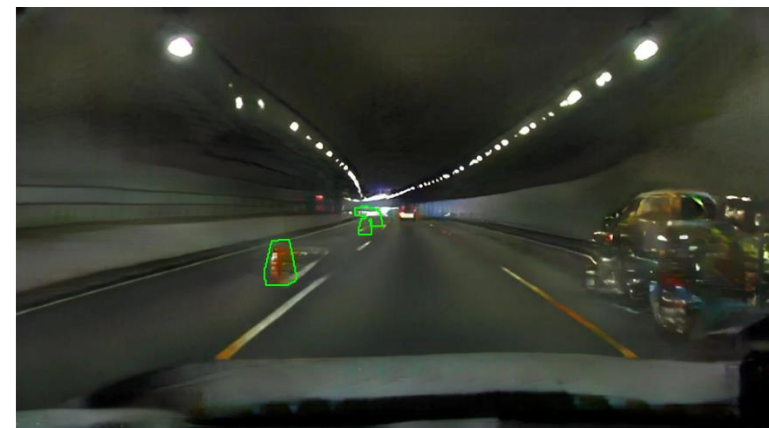

Resynthesized image (GAN Resynth)

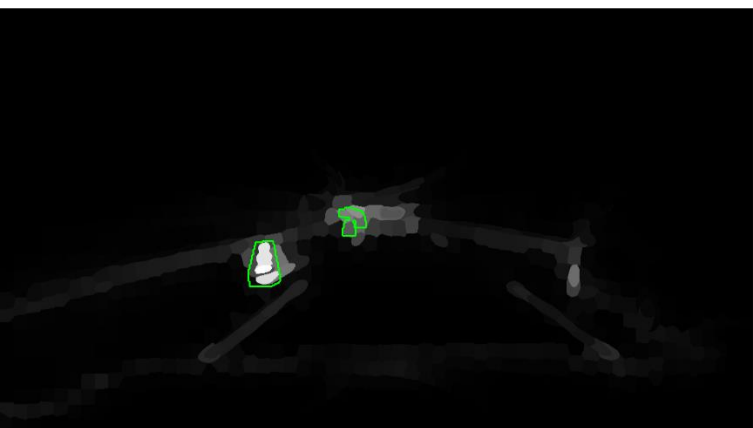

Anomaly heat map (Ours ; w/ postpro)

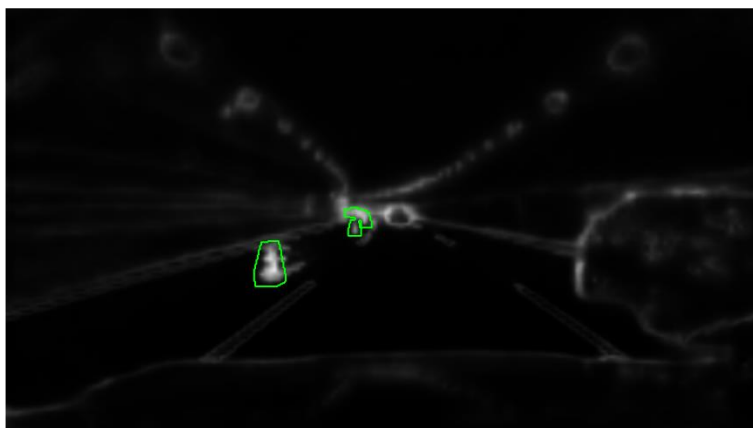

Anomaly heat map (Ours ; w/o postpro)

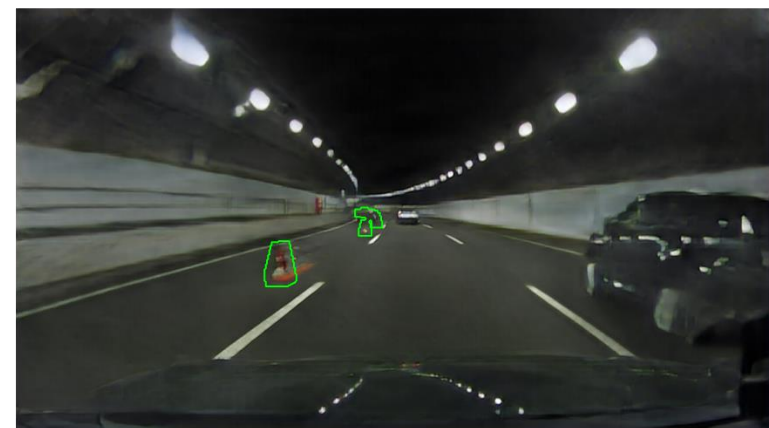

Resynthesized image (Ours)



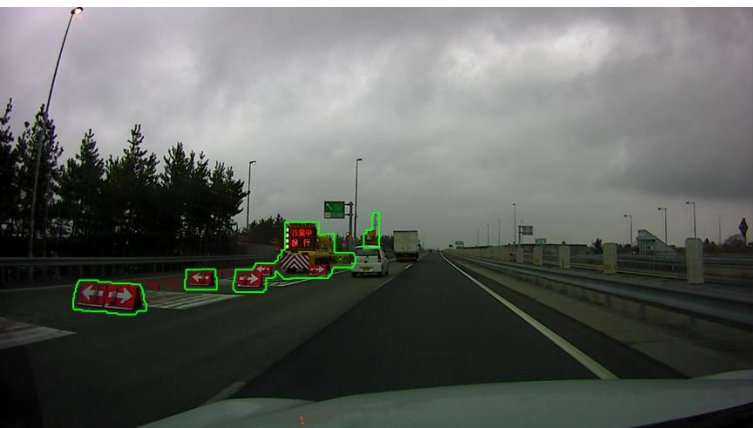

Input image

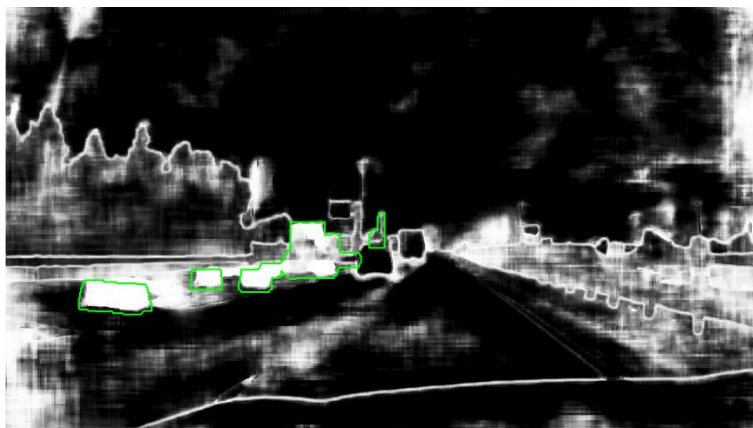

Anomaly heat map (GAN Resynth)

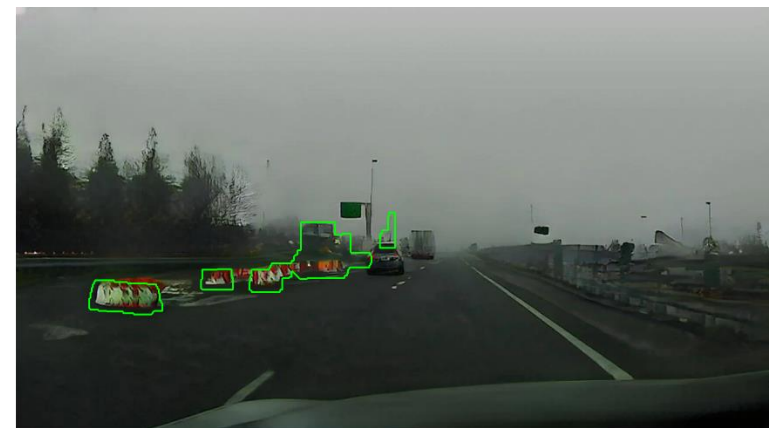

Resynthesized image (GAN Resynth)

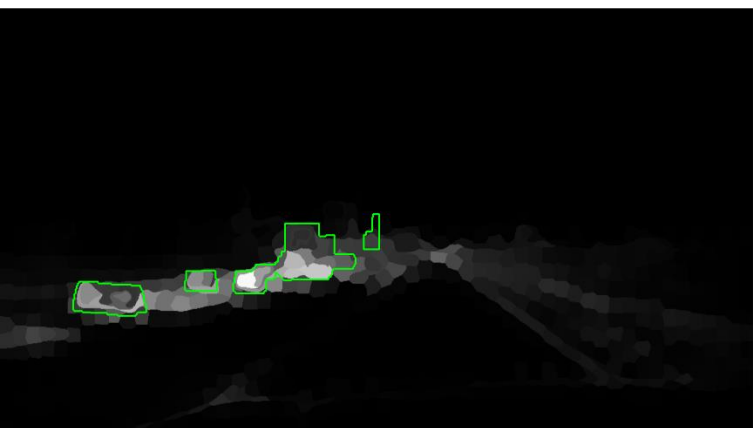

Anomaly heat map (Ours ; w/ postpro)

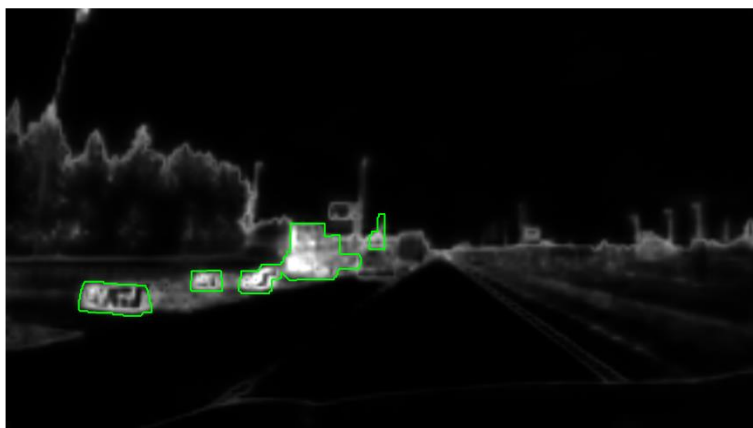

Anomaly heat map (Ours ; w/o postpro)

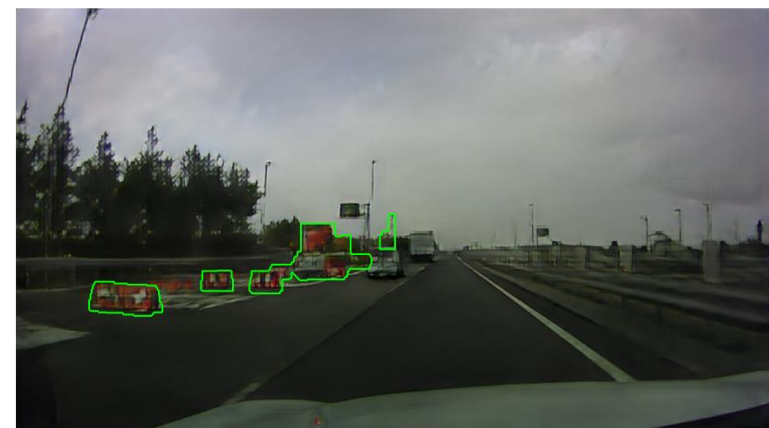

Resynthesized image (Ours)

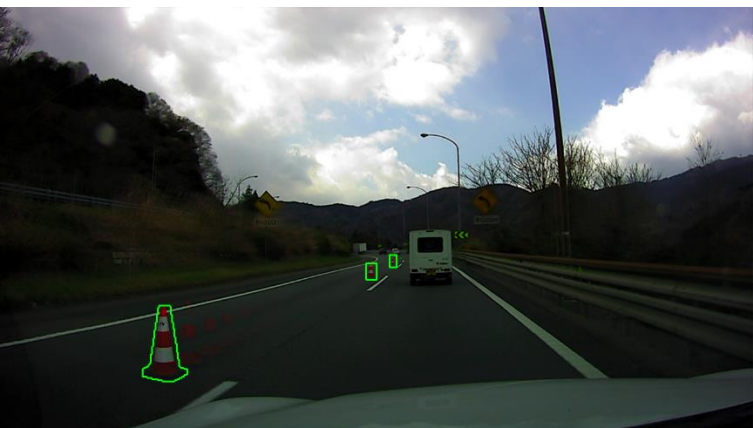

Input image

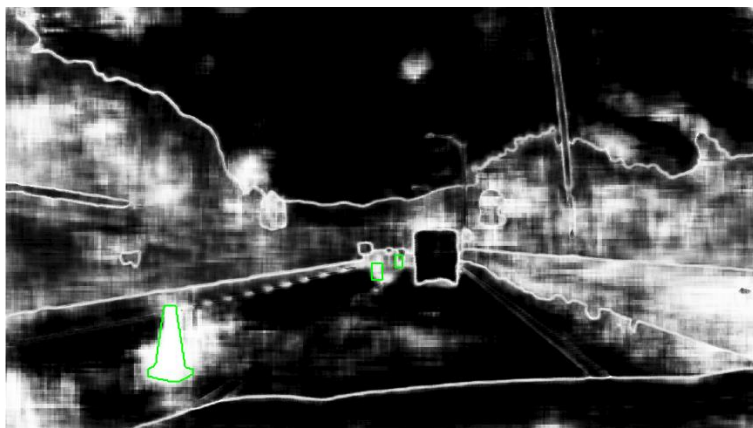

Anomaly heat map (GAN Resynth)

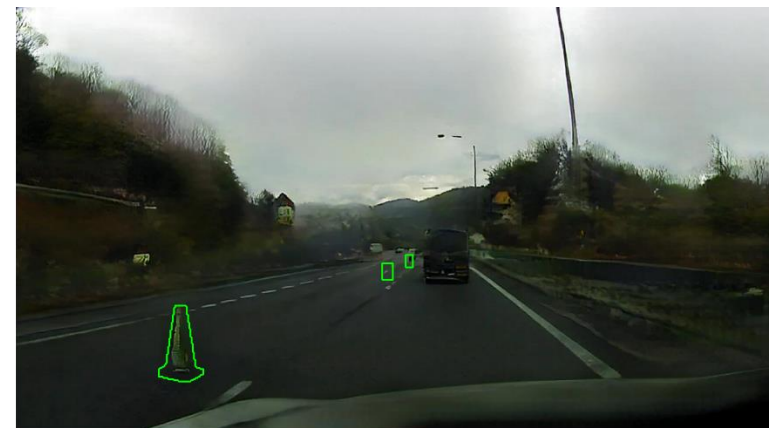

Resynthesized image (GAN Resynth)

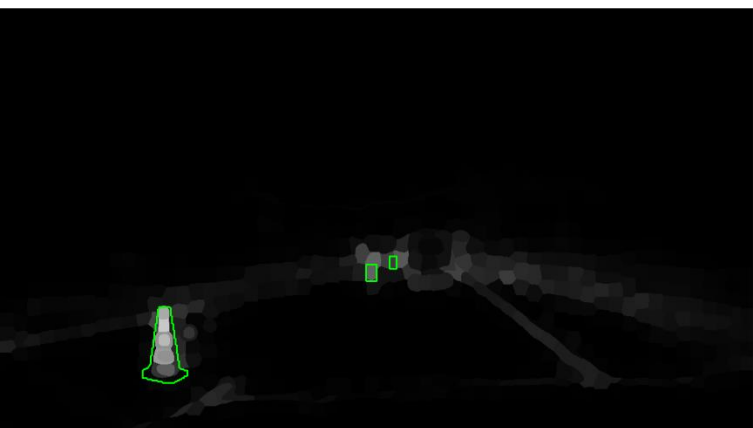

Anomaly heat map (Ours ; w/ postpro)

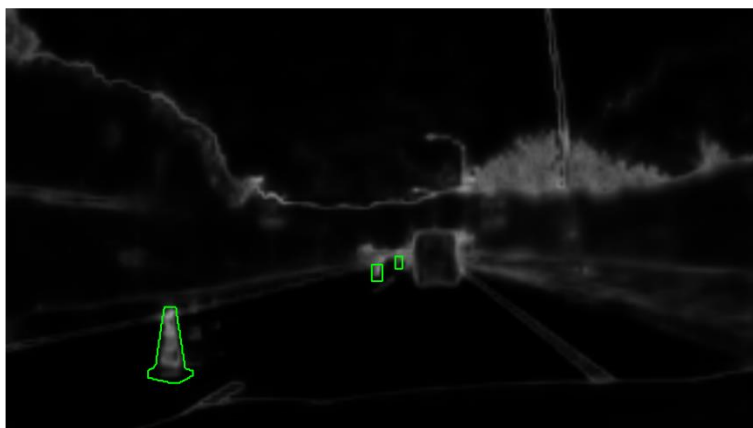

Anomaly heat map (Ours ; w/o postpro)

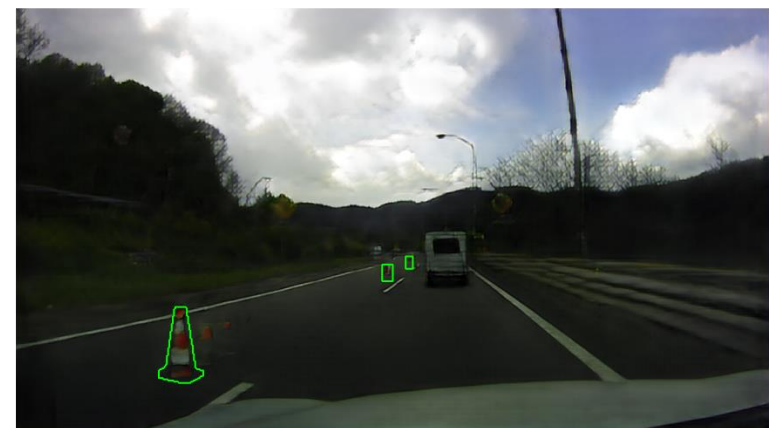

Resynthesized image (Ours)
