# Supplementary material
Source: ML conference proceedings conference paper supplement (https://openaccess.thecvf.com/content/ACCV2020/html/Ohgushi_Road_Obstacle_Detection_ACCV_2020_paper.html)
Supplement: Supplementary file 2 [file demo_readme.pdf › 0322-supp/demo_readme.pdf]

|                                                     |                          |                                    |
|-----------------------------------------------------|--------------------------|------------------------------------|
| Input image                                         | -                        | Perceptual Loss                    |
| Resynthesized image                                 | Semantic map             | Entropy                            |
| Difference between input<br>and Resynthesized image | Anomaly map<br>(colored) | Anomaly map<br>(gray scale)        |
| Detection results<br>(regions colored red)          | Saliency map             | Super-pixels on<br>the anomaly map |
